# Supplementary material
Source: PubMed Central journal article supplement (PMC9559782)
Supplement: JSLHR-65-1659-s004.pdf [file JSLHR-65-1659-s004.pdf]

**Supplemental Material S4.** The top 30 most prevalent diagnoses in the 52,726-patient dataset along with their respective sample sizes. Also included is the sample size of patients with no diagnosis information reported.

| Rank | Diagnosis                               | <i>n</i> |
|------|-----------------------------------------|----------|
| 1    | Gastroesophageal reflux                 | 4,236    |
| 2    | Hypertension                            | 3,977    |
| 3    | Cerebrovascular accident                | 3,747    |
| 4    | Chronic obstructive pulmonary disease   | 2,072    |
| 5    | Head & neck cancer                      | 1,981    |
| 6    | Hyperlipidemia                          | 1,543    |
| 7    | Pneumonia-acquired                      | 1,217    |
| 8    | Coronary artery disease                 | 1,197    |
| 9    | Respiratory failure                     | 1,188    |
| 10   | Fibrillation, atrial                    | 1,010    |
| 11   | Diabetes, insulin dependent             | 995      |
| 12   | Congestive heart failure                | 984      |
| 13   | Dementia, general                       | 842      |
| 14   | Diabetes, non-insulin dependent         | 815      |
| 15   | Parkinson's disease, without dementia   | 712      |
| 16   | Shortness of breath                     | 676      |
| 17   | Cough                                   | 660      |
| 18   | Pneumonia-aspiration, right, lower lobe | 554      |
| 19   | Anemia                                  | 497      |
| 20   | Pneumonia-aspiration, left, lower lobe  | 467      |
| 21   | Epilepsy/seizure disorder               | 368      |
| 22   | Lung cancer                             | 364      |
| 23   | Traumatic brain injury                  | 348      |
| 24   | Parkinson's disease, with dementia      | 334      |
| 25   | Sepsis                                  | 334      |
| 26   | Encephalopathy                          | 308      |
| 27   | Dementia, other                         | 283      |
| 28   | Alzheimer's disease                     | 277      |
| 29   | Other specified disorders of thyroid    | 271      |
| 30   | Multiple sclerosis                      | 262      |
| NA   | Not reported                            | 31,380   |
